# Supplementary material for: Clonally expanded HIV-1 proviruses with 5′-leader defects can give rise to nonsuppressible residual viremia
Source: PubMed Central journal article supplement (PMC10014112; doi:10.1172/jci165245), 2023-03-15

**Original blot images for Figure 3B.**

Top panel, WT NL4-3

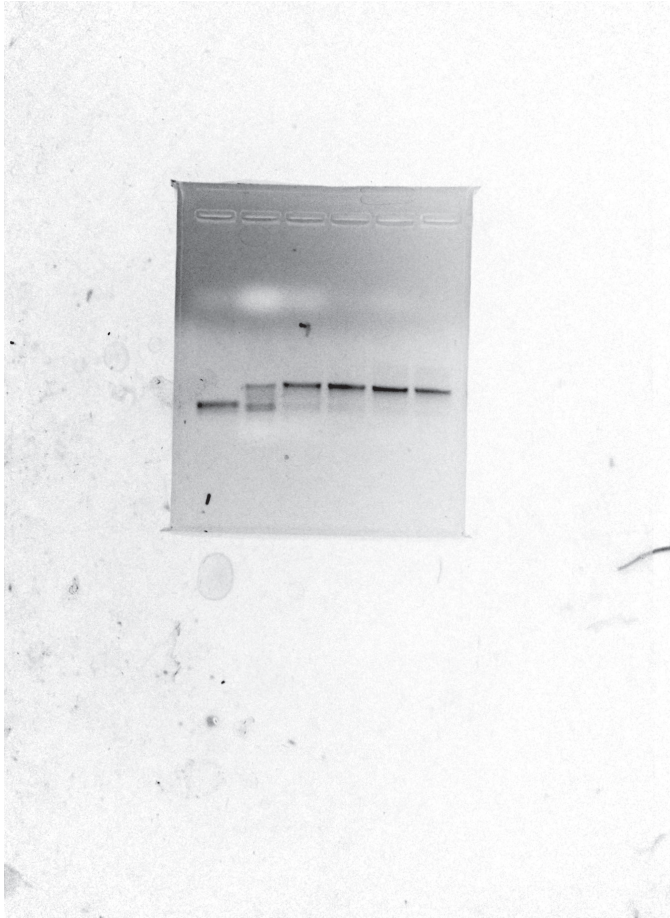

Middle panel, D22 NL4-3

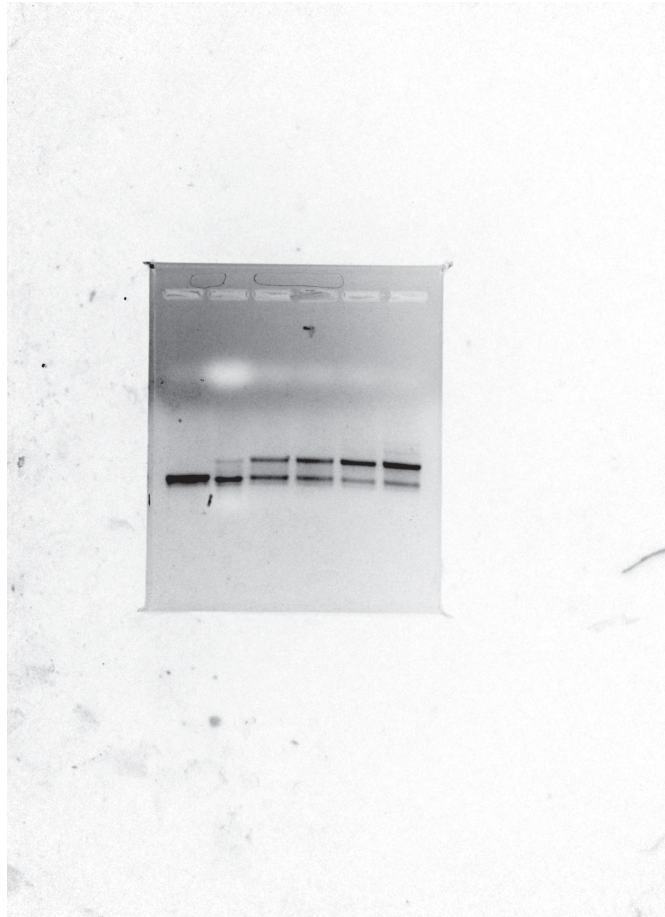

Bottom panel, D21 NL4-3

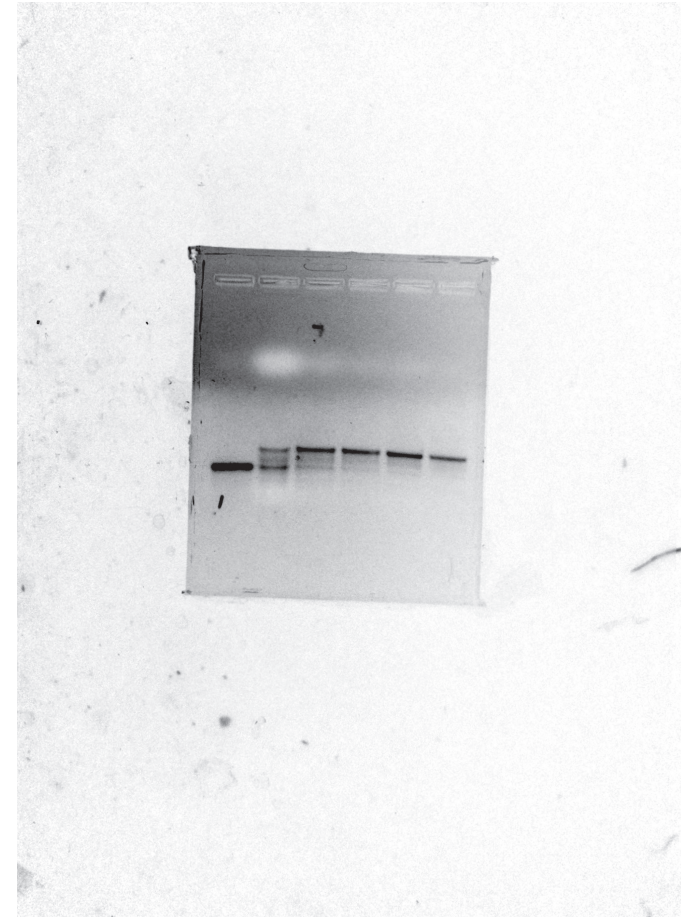

# Original western blot images used for Figure 5.

Membrane with mass ladder

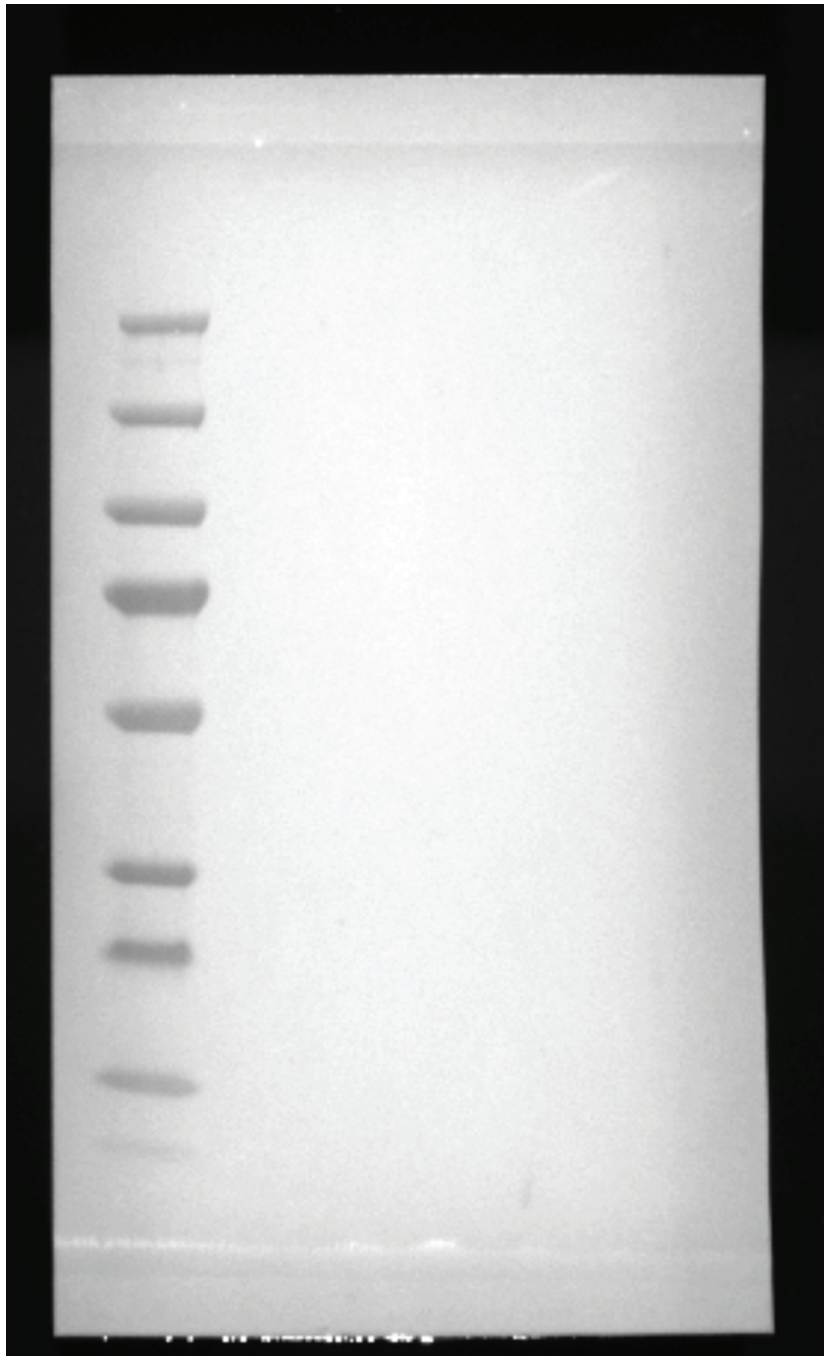

Chemi luminescent signal with secondary Ab for p24

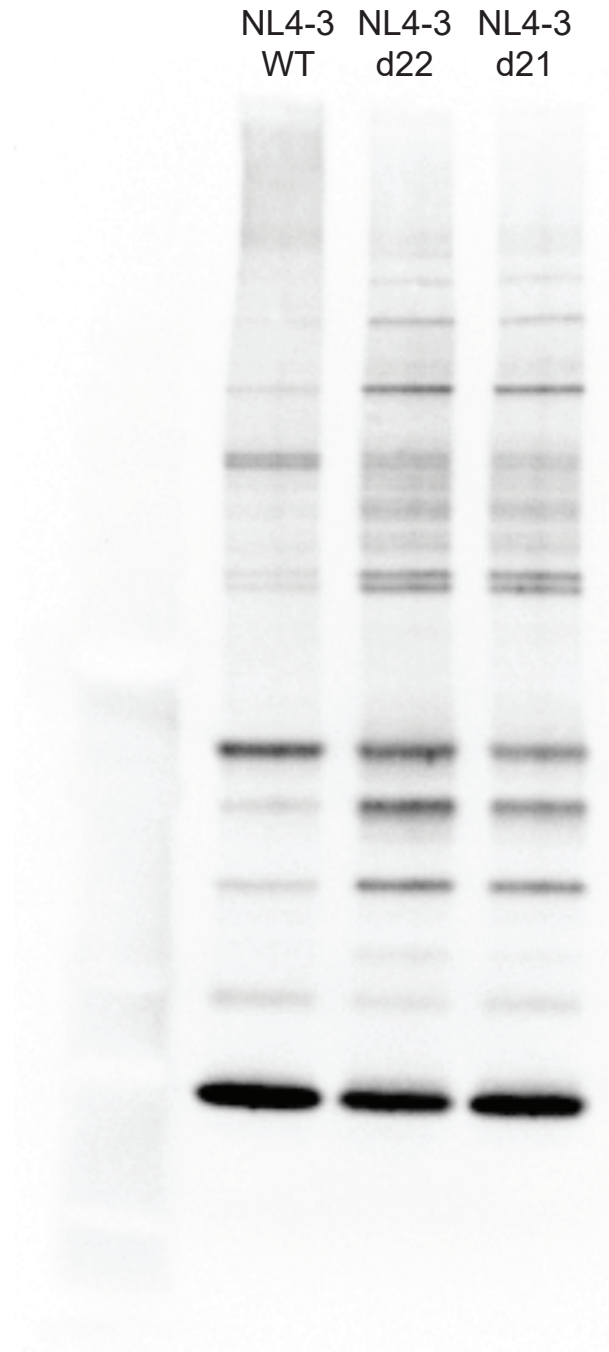

Chemi luminescent signal with secondary Ab for gp41

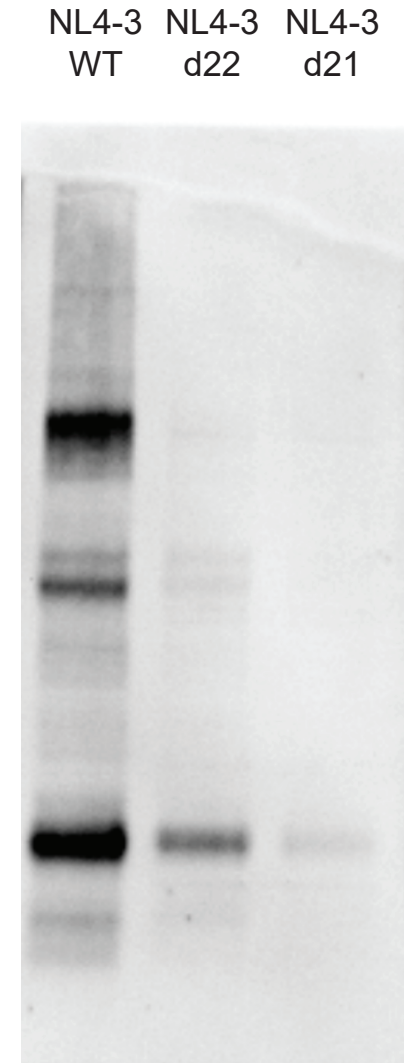

Supplement: jci-133-165245-s077.pdf [file jci-133-165245-s077.pdf]
